# Supplementary material for: Critical Load Exceedances for North America and Europe using an Ensemble of Models and an Investigation of Causes for Environmental Impact Estimate Variability: An AQMEII4 Study
Source: Copernicus journal article supplement (doi:10.5194/egusphere-2024-2226), 2024-07-30
Supplement: Supplementary file 1 [file egusphere-2024-2226-supplement.pdf]

1 *Supplement of*  
2 **Critical Load Exceedances for North America and Europe using an**  
3 **Ensemble of Models and an Investigation of Causes for**  
4 **Environmental Impact Estimate Variability: An AQMEII4 Study**

5 **Paul A. Makar et al.**

6 *Correspondence to : Paul A. Makar ([paul.makar@ec.gc.ca](mailto:paul.makar@ec.gc.ca))*

7 **This PDF file includes the following information:**

8 *1.0 Background information – Introduction to the Critical Load concept*..... 1  
9 *2.0 Critical Load Exceedance Maps for Europe, 2009, and North America, 2010*..... 3  
10 *3.0 Observation Station Locations* ..... 10  
11 *4.0 Cross-track Infrared Sounding (CrIS) Sensor Retrieval Details* ..... 13  
12 *5.0 Precipitation Evaluation*..... 14  
13 *6.0 Additional annual effective mass flux figures*..... 15

15 *1.0 Background information – Introduction to the Critical Load concept*  
16

17 As noted in the main document, a critical load in this context was defined (Nilsson and Grennfelt, 1988)  
18 as “A quantitative estimate of an exposure to one or more pollutants below which significant harmful  
19 effects on specified sensitive elements of the environment do not occur, according to present knowledge”.

20 The Nilsson and Grennfelt (1988) definition is worthy of parsing in order to ensure understanding of its  
21 implications in context to the present work, and doing so will aid in the interpretation of our analysis  
22 results.

23 With regards to “exposure to one or more pollutants”, both sulphur and nitrogen-containing compounds  
24 are considered to be relevant for acidification, and these may be deposited in different forms. Sulphur is  
25 deposited as gaseous sulphur dioxide (SO<sub>2</sub> dry deposition), as sulphate or bisulphite ions in precipitation  
26 (SO<sub>4</sub><sup>2-</sup> and HSO<sub>3</sub><sup>-</sup> wet deposition), or when particles containing sulphate reach and remain on the surface  
27 (particulate sulphate dry deposition). Nitrogen deposition comprises a larger number of chemical species,  
28 with contributions of dry deposition of gases (nitrogen dioxide (NO<sub>2</sub>), nitric acid (HNO<sub>3</sub>), ammonia  
29 (NH<sub>3</sub>), peroxyacetylnitrate (PAN), organic nitrates (a host of possible species), dinitrogen pentoxide  
30 (N<sub>2</sub>O<sub>5</sub>), pernitric acid (HNO<sub>4</sub>) and nitrogen monoxide (NO), and a variety of other species in low  
31 concentrations), nitrate and ammonium ions in precipitation (NO<sub>3</sub><sup>-</sup> and NH<sub>4</sub><sup>+</sup> wet deposition), and dry  
32 deposition of particulate nitrate and ammonium. Chemical transport models (CTMs) must therefore  
33 accurately estimate the sulphur and nitrogen containing species’ emissions, transport, chemical reactions  
34 (gaseous, particulate, aqueous), cloud processing (uptake of gases and aerosols into hydrometeors such as  
35 cloud water, rain, snow, graupel, etc), precipitation (transfer of the resulting chemically transformed  
36 species to the surface of the earth during precipitation events), and removal fluxes at the surface (dry  
37 deposition). The manner in which these complex processes are carried out depends on the

38 implementation details of the specific CTM. As atmospheric science progresses, the process  
39 representation of the CTMs changes and improves. Estimates of environmental impacts of deposition  
40 may thus also change over time, not just in response to changes in emissions and other atmospheric and  
41 environmental conditions, but also due to the gradual progress of air-quality modelling science.

42 With regards to “according to present knowledge” – this part of the definition also acknowledges that  
43 knowledge changes over time. The underlying data used in estimating critical loads may improve – for  
44 example by including chemical species previously believed to have an insignificant impact on  
45 exceedances (Liggio *et al.*, 2024). The CTMs used to generate deposition fluxes for critical load  
46 development and critical load exceedance (CLE) estimates are frequently updated, with new process  
47 representation, which in turn may lead to changes in the predicted deposition fluxes. The emissions  
48 inputs to the models may also change, reflecting better emissions data collection, the enactment of  
49 emissions control legislation, changing environmental conditions (year to year variability in meteorology,  
50 as well as climate change), and changes in the quality of land use and proxy data used to determine both  
51 emissions and deposition fluxes. These changes imply the need to carry out critical load exceedance  
52 calculations on an ongoing basis, so that the estimation of ecosystem impact assessments makes use of the  
53 most recent science and best available input data.

54 With regards to “below which *significant* harmful effects on specified sensitive elements of the  
55 environment do *not* occur,”: the usual approach in defining critical loads is to set, in advance, a level of  
56 ecosystem change that is expected to have negative effects on connected components or ecosystem  
57 services. Typically, the pollutant loading corresponding to a certain level of ecosystem damage is used  
58 (e.g., the amount of acidifying deposition at which 90 or 95% of sensitive species remain undamaged  
59 despite the given deposition level, the amount of N deposition resulting in 80% of sensitive plant species  
60 remaining undamaged, etc.; CLRTAP, 2023). Critical load values vary across the landscape and  
61 ecosystem components. For example, lichen communities are very sensitive to small changes, while  
62 herbaceous communities have natural buffers that require higher levels of deposition before species are  
63 lost (Simkin *et al.*, 2016, Geiser *et al.*, 2019). Potential ecosystem damage is considered to be  
64 “significant” above this level of deposition – but deposition below the critical load does not imply an  
65 *absence* of potential ecosystem damage.

#### 66 References:

- 67 CLRTAP, 2023: UNECE CLRTAP (2023). Manual on Methodologies and Criteria for Modelling and  
68 Mapping Critical Loads and Levels and Air Pollution Effects, Risks, and Trends. Dessau-Roßlau,  
69 UBA TEXTE 109/2023. [https://www.umweltbundesamt.de/en/publikationen/manual-on-](https://www.umweltbundesamt.de/en/publikationen/manual-on-methodologies-criteria-for-modelling-0)  
70 [methodologies-criteria-for-modelling-0](https://www.umweltbundesamt.de/en/publikationen/manual-on-methodologies-criteria-for-modelling-0)
- 71 Geiser, L. H., Nelson, P.R., Jovan, S.E., Root, H.T., and Clark, C.M., Assessing Ecological Risks from  
72 Atmospheric Deposition of Nitrogen and Sulfur to US Forests Using Epiphytic Macrolichens,  
73 *Diversity* 11(6): 87, 2019. <https://doi.org/10.3390/d11060087>
- 74 Liggio, J., Makar, P.A., Li, S-M., Hayden, K., Darlington, A., Moussa, S., Wren, S., Staebler, R.,  
75 Wentzell, J., Wheeler, M., Leithead, A., Mittermeier, R., Narayan, J., Wolde, M., Blanchard, D.,  
76 Aherne, J., Kirk, J., Lee, C., Stroud, C., Zhang, J., Akingunola, A., Katal, A., Cheung, P.,  
77 Ghahreman, R., Majdzadeh, M., He, M., Ditto, J., Gentner, D.R., Total organic carbon dry  
78 deposition outpaces atmospheric processing with unaccounted implications for air quality and  
79 freshwater ecosystems, *Science Advances*, (under review), 2024.
- 80 Nilsson, J., and Grennfelt, P., Critical loads for sulphur and nitrogen, in: Report from a workshop held at  
81 Skokloster, Sweden 19–24 March 1988, J. Nilsson, Ed., Miljörapport, Volume 15 of Nordic  
82 Council of Ministers-Publications-Nord, 418pp, 1988. Simkin *et al.*, 2016

83 Simkin, S. M., Allen, E.B., Bowman, W.D., Clark, C.M., Belnap, J., Brooks, M.L., Cade, B.S., Collins,  
84 S.L., Geiser, L.H., Gilliam, F.S., Jovan, S.E., Pardo, L.H., Schulz, B.K., Stevens, C.I., Suding,  
85 K.N., Throop, H.L., and Waller, D.M., Conditional vulnerability of plant diversity to atmospheric  
86 nitrogen deposition across the United States, Proc. Nat. Acad. Sci., 113(15), 4086-4091, 2016.  
87 <https://doi.org/10.1073/pnas.1515241113>  
88

89 *2.0 Critical Load Exceedance Maps for Europe, 2009, and North America, 2010.*  
90 Figure S1. CLEs for Acidity, EU domain, 2009, eq ha<sup>-1</sup>yr<sup>-1</sup> (a) WRF-Chem (IASS), (b) LOTOS-EUROS  
91 (TNO), (c) WRF-Chem (UPM), (d) CMAQ (Hertfordshire). Grey areas indicate regions for which  
92 critical load data are available but are not in exceedance of critical loads. Coloured areas indicate  
93 exceedance regions.

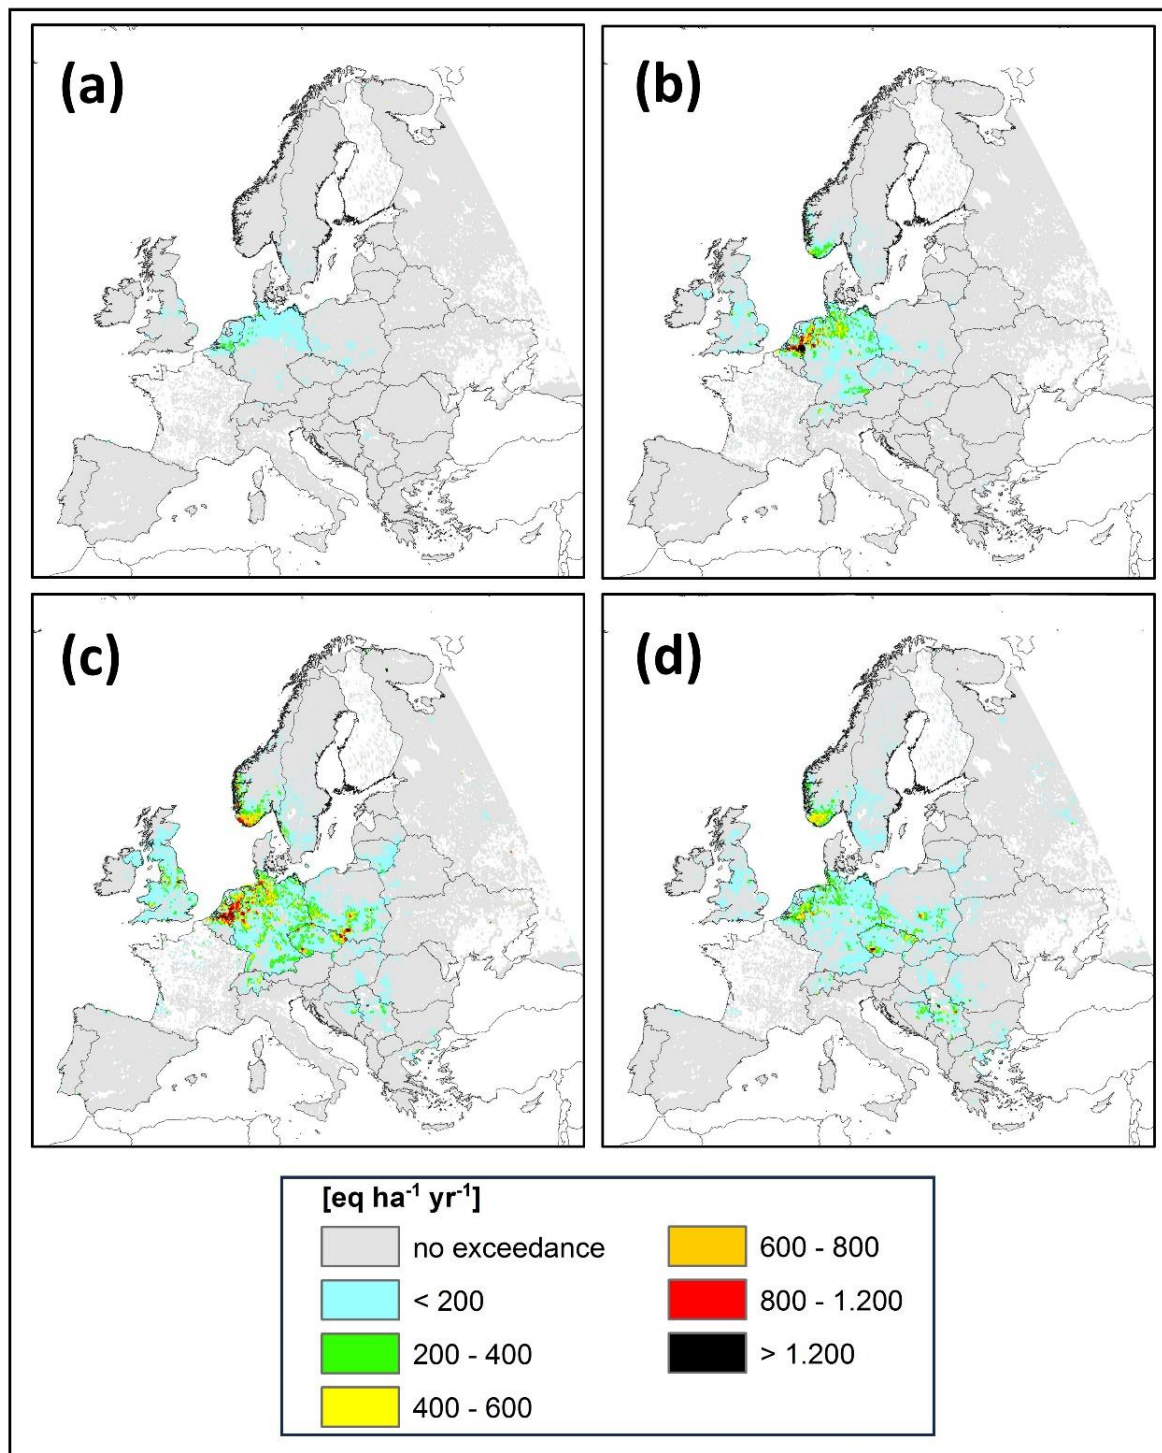

94

95 Figure S2. CLEs for Eutrophication, EU domain, 2009, eq ha<sup>-1</sup>yr<sup>-1</sup> (a) WRF-Chem (IASS), (b) LOTOS-  
 96 EUROS (TNO), (c) WRF-Chem (UPM), (d) CMAQ (Hertfordshire). Grey areas indicate regions for  
 97 which critical load data are available but are not in exceedance of critical loads. Coloured areas indicate  
 98 exceedance regions.



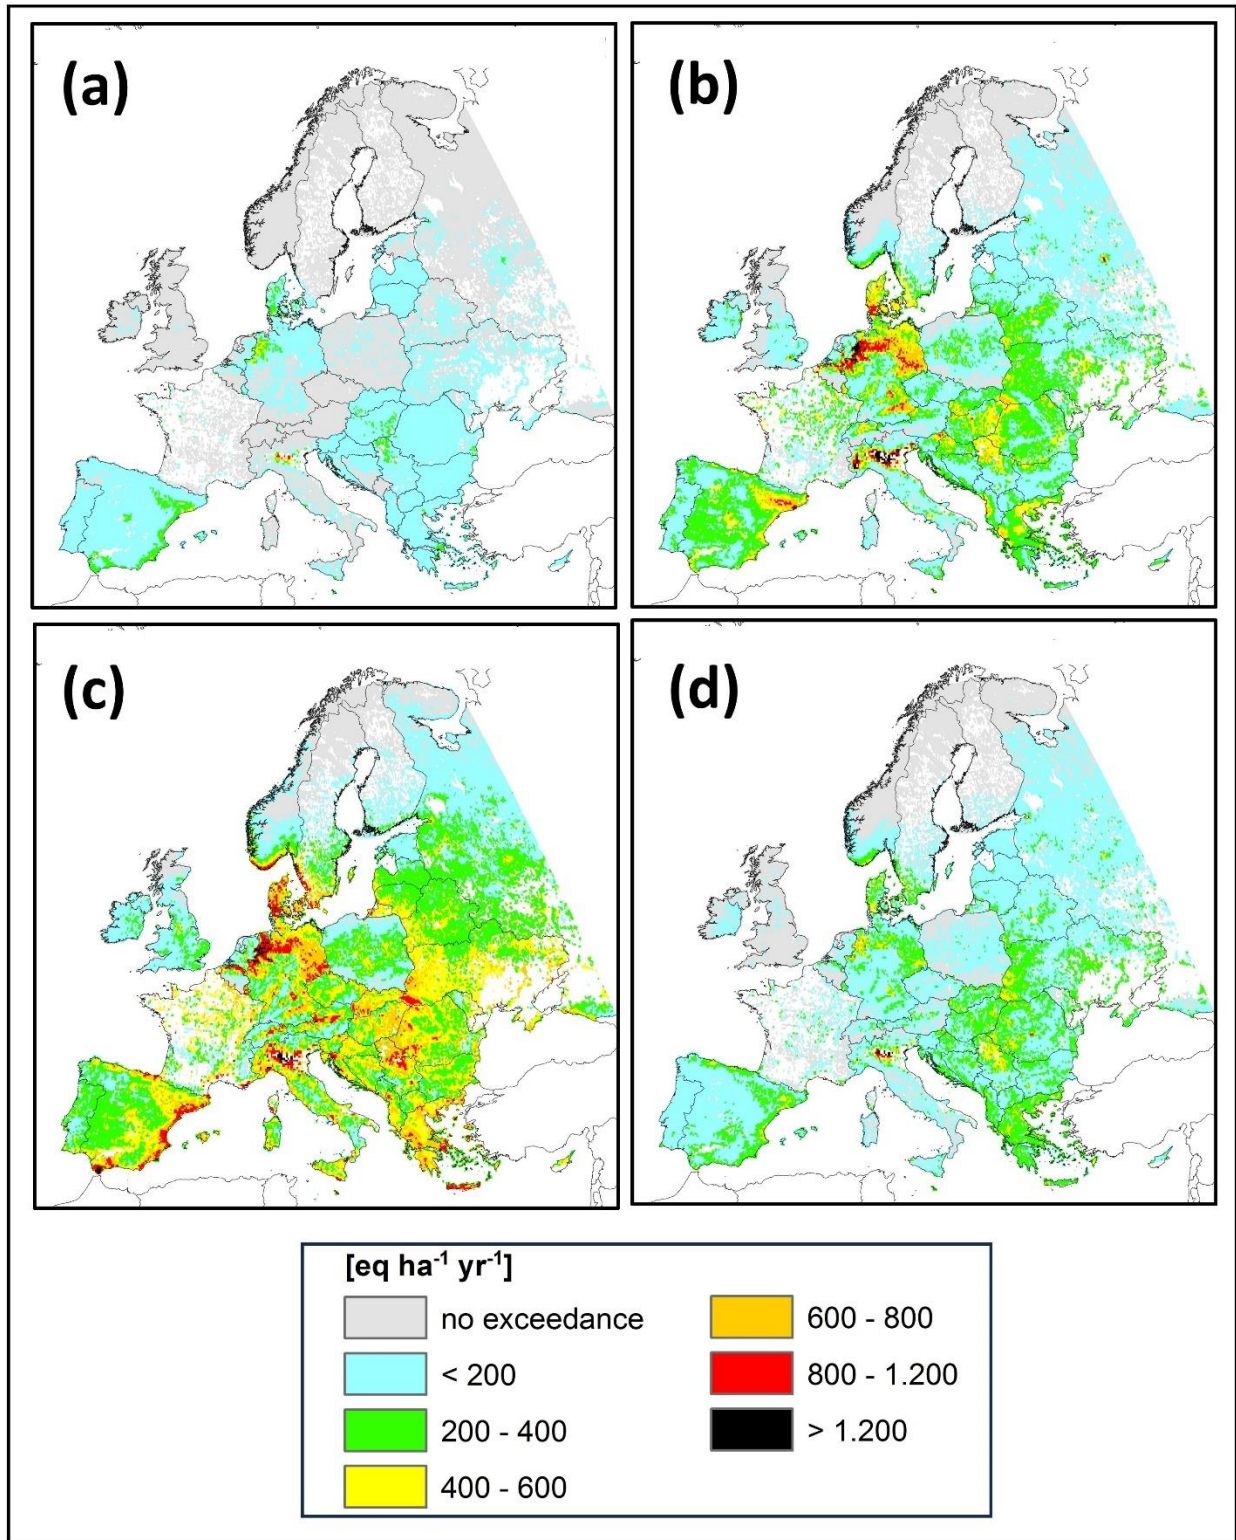

99

100 Figure S3. CLEs for Forest Ecosystems, NA domain, 2010,  $\text{eq ha}^{-1} \text{yr}^{-1}$  (a) CMAQ-M3DRY (EPA), (b)  
 101 CMAQ-STAGE (EPA), (c) WRF-Chem (IASS), (d) GEM-MACH-Base (ECCC), (e) GEM-MACH-  
 102 Zhang (ECCC), (f) GEM-MACH-Ops (ECCC), (g) WRF-Chem (UPM), (h) WRF-Chem (UCAR). Grey

103 areas indicate regions for which critical load data are available but are not in exceedance of critical loads.  
104 Coloured areas indicate exceedance regions.

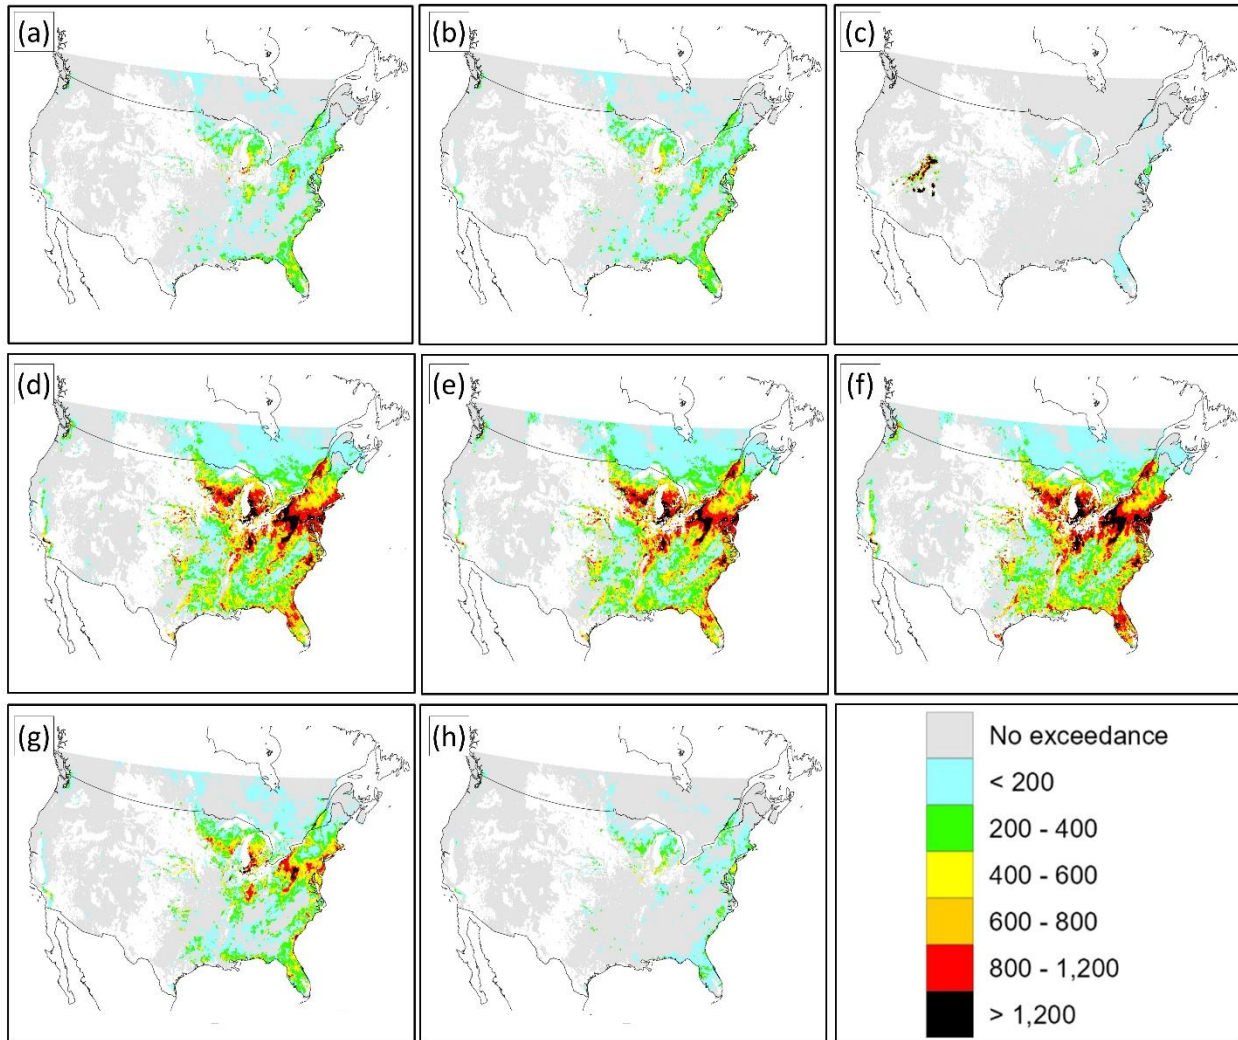

105

106

107 Figure S4. CLEs for Aquatic Ecosystems, NA domain, 2010, eq ha<sup>-1</sup>yr<sup>-1</sup>. Panels arranged as in Figure S3;  
108 individual lakes are shown as pixels. Light grey pixels indicate regions for which critical load data were  
109 available but were not in exceedance of critical loads. Coloured areas indicate exceedance regions;  
110 overplotting in precedence by the extent of exceedance was carried out for overlapping pixels.

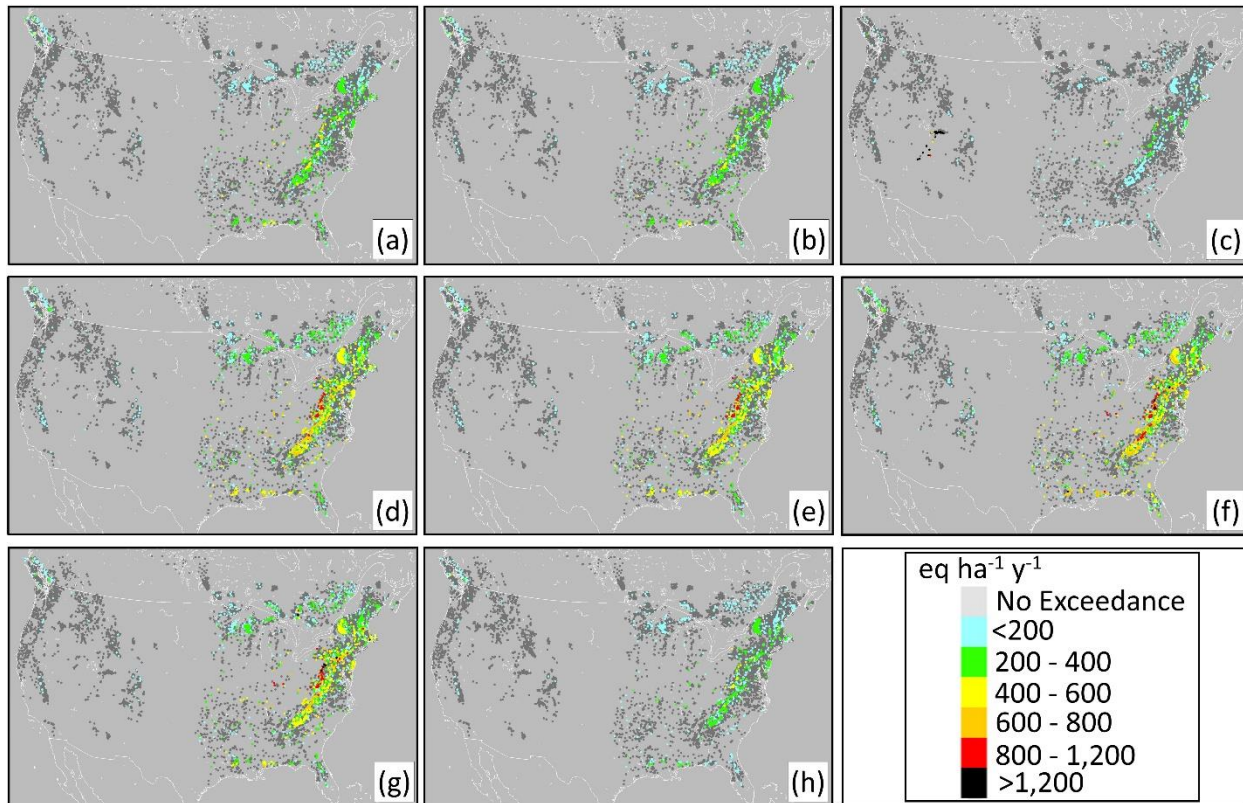

111  
112  
113



114 Figure S5. CLEs for Lichen Species, NA domain, 2010, eq ha<sup>-1</sup>yr<sup>-1</sup>. Panels arranged by model as in  
115 Figure S3. Light grey areas indicate regions for which critical load data were available but were not in  
116 exceedance of critical loads. Coloured areas indicate exceedance regions.

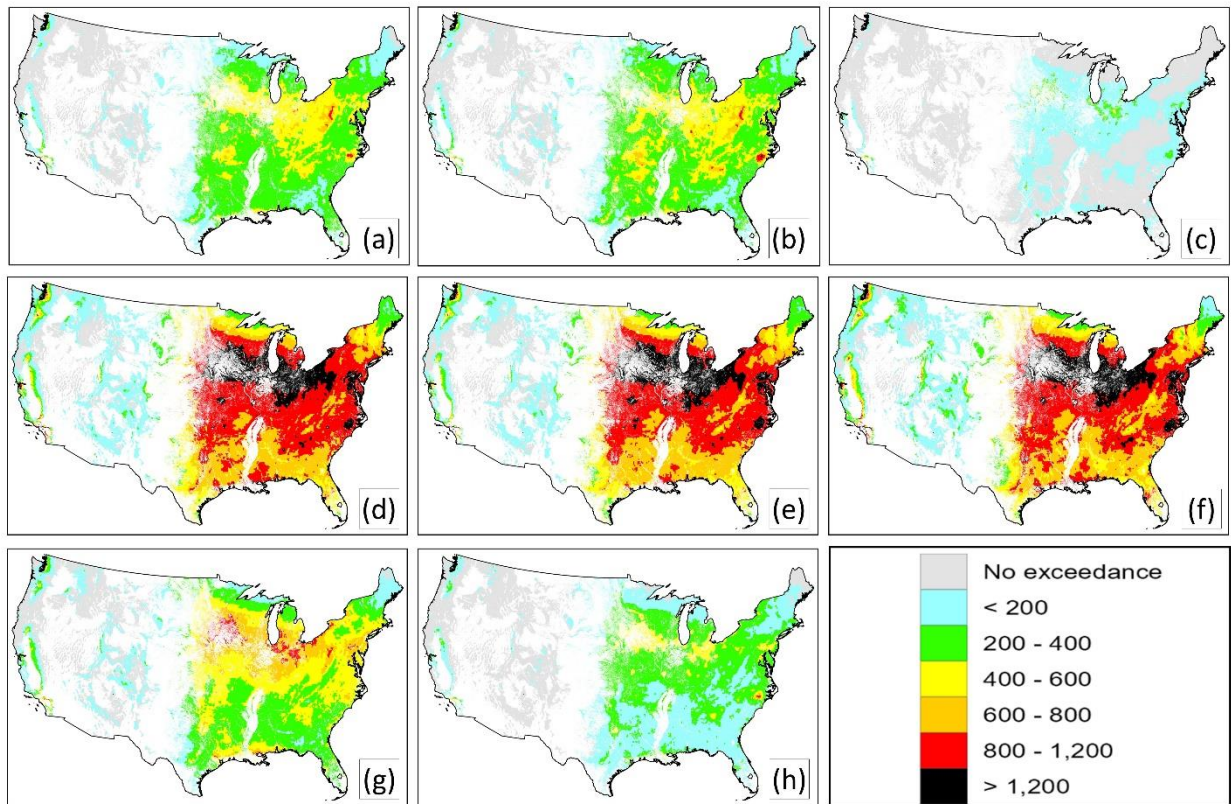

117

118



119 Figure S6. CLEs for Herbaceous Species Community Richness, NA common domain, 2010, eq ha<sup>-1</sup>yr<sup>-1</sup>.  
120 Panels arranged by mdel as in Figure S3. Light grey areas indicate regions for which critical load data  
121 were available but were not in exceedance of critical loads. Coloured areas indicate exceedance regions.

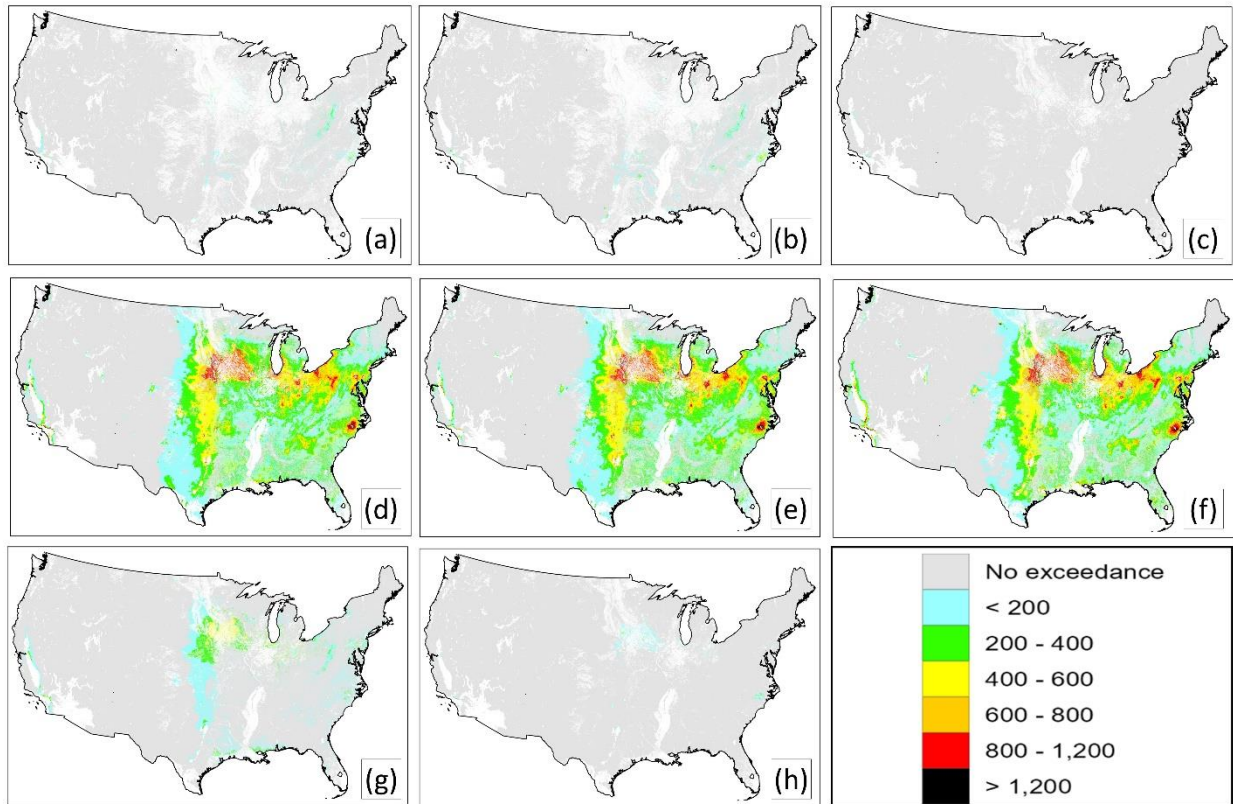

122

123

124 *3.0 Observation Station Locations*

125

126 Figure S7. (a) Wet S deposition station locations (yellow: CAPMoN daily wet deposition; green: NADP  
127 weekly wet deposition, (b) Daily PM2.5 sulphate and ammonium air concentration station locations.

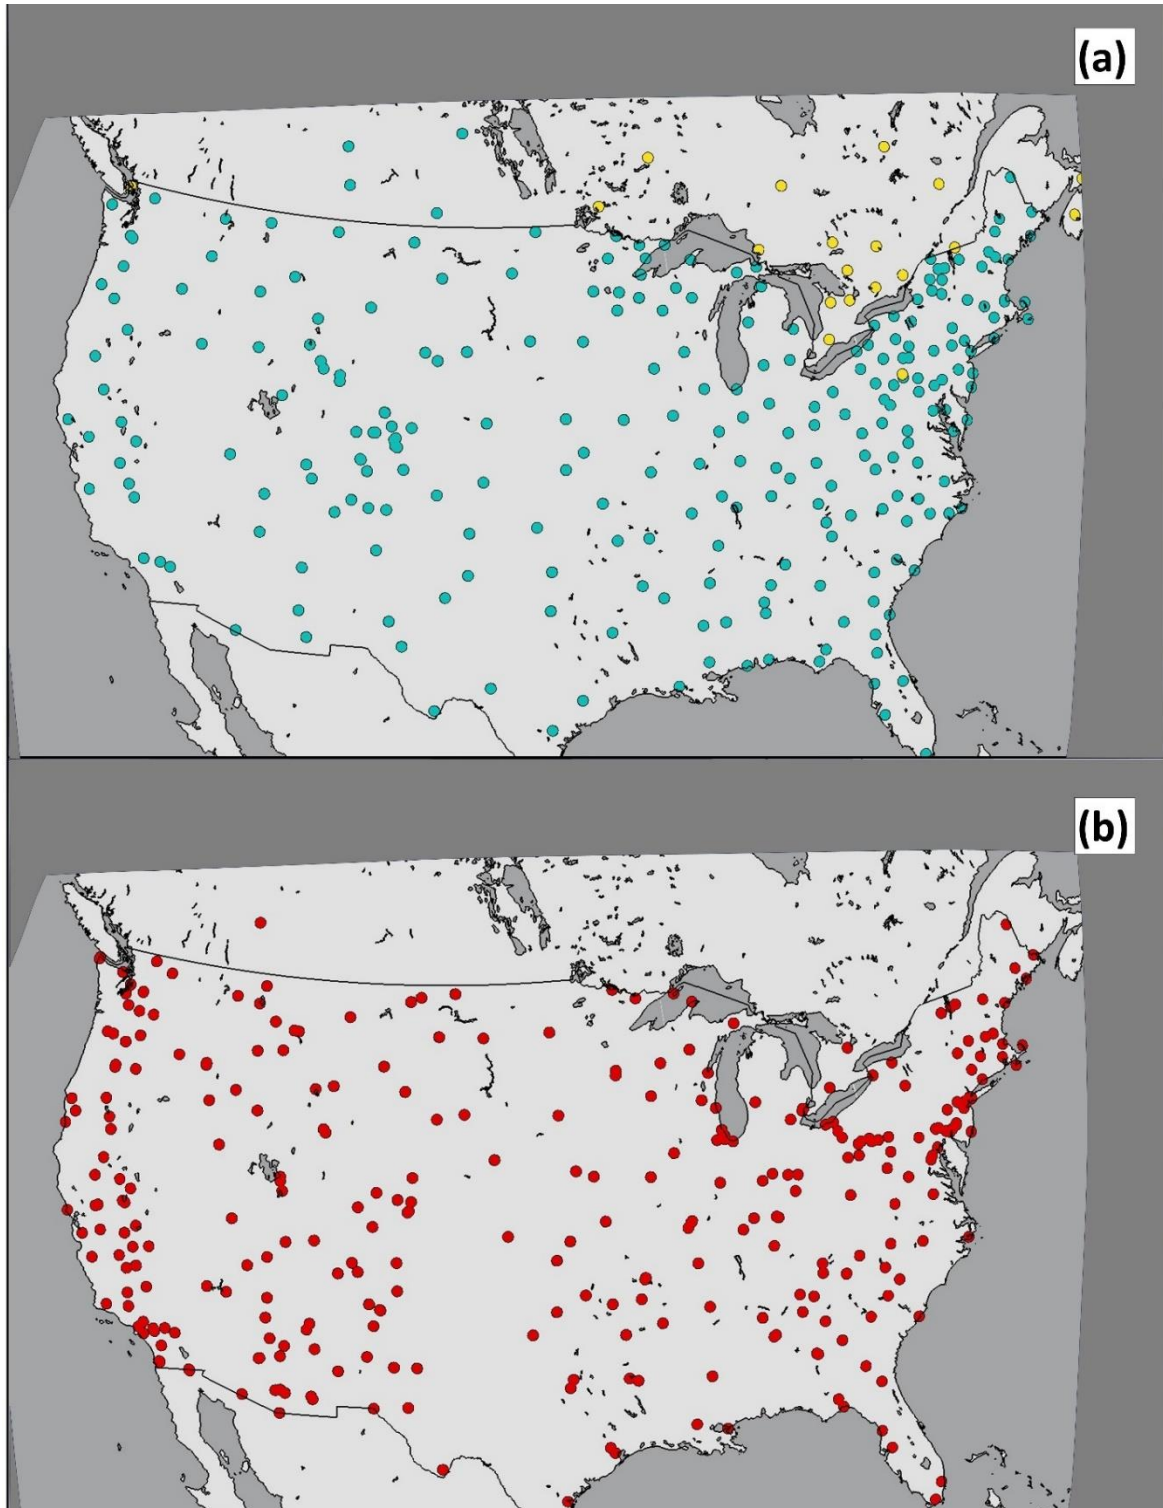

128

129 Figure S8. (a) SO<sub>2</sub> surface observation station locations (yellow: CAPMoN daily; yellow: NADPhourly  
130 green), (b) AMoN NH<sub>3</sub> Observation Stations, 2016.

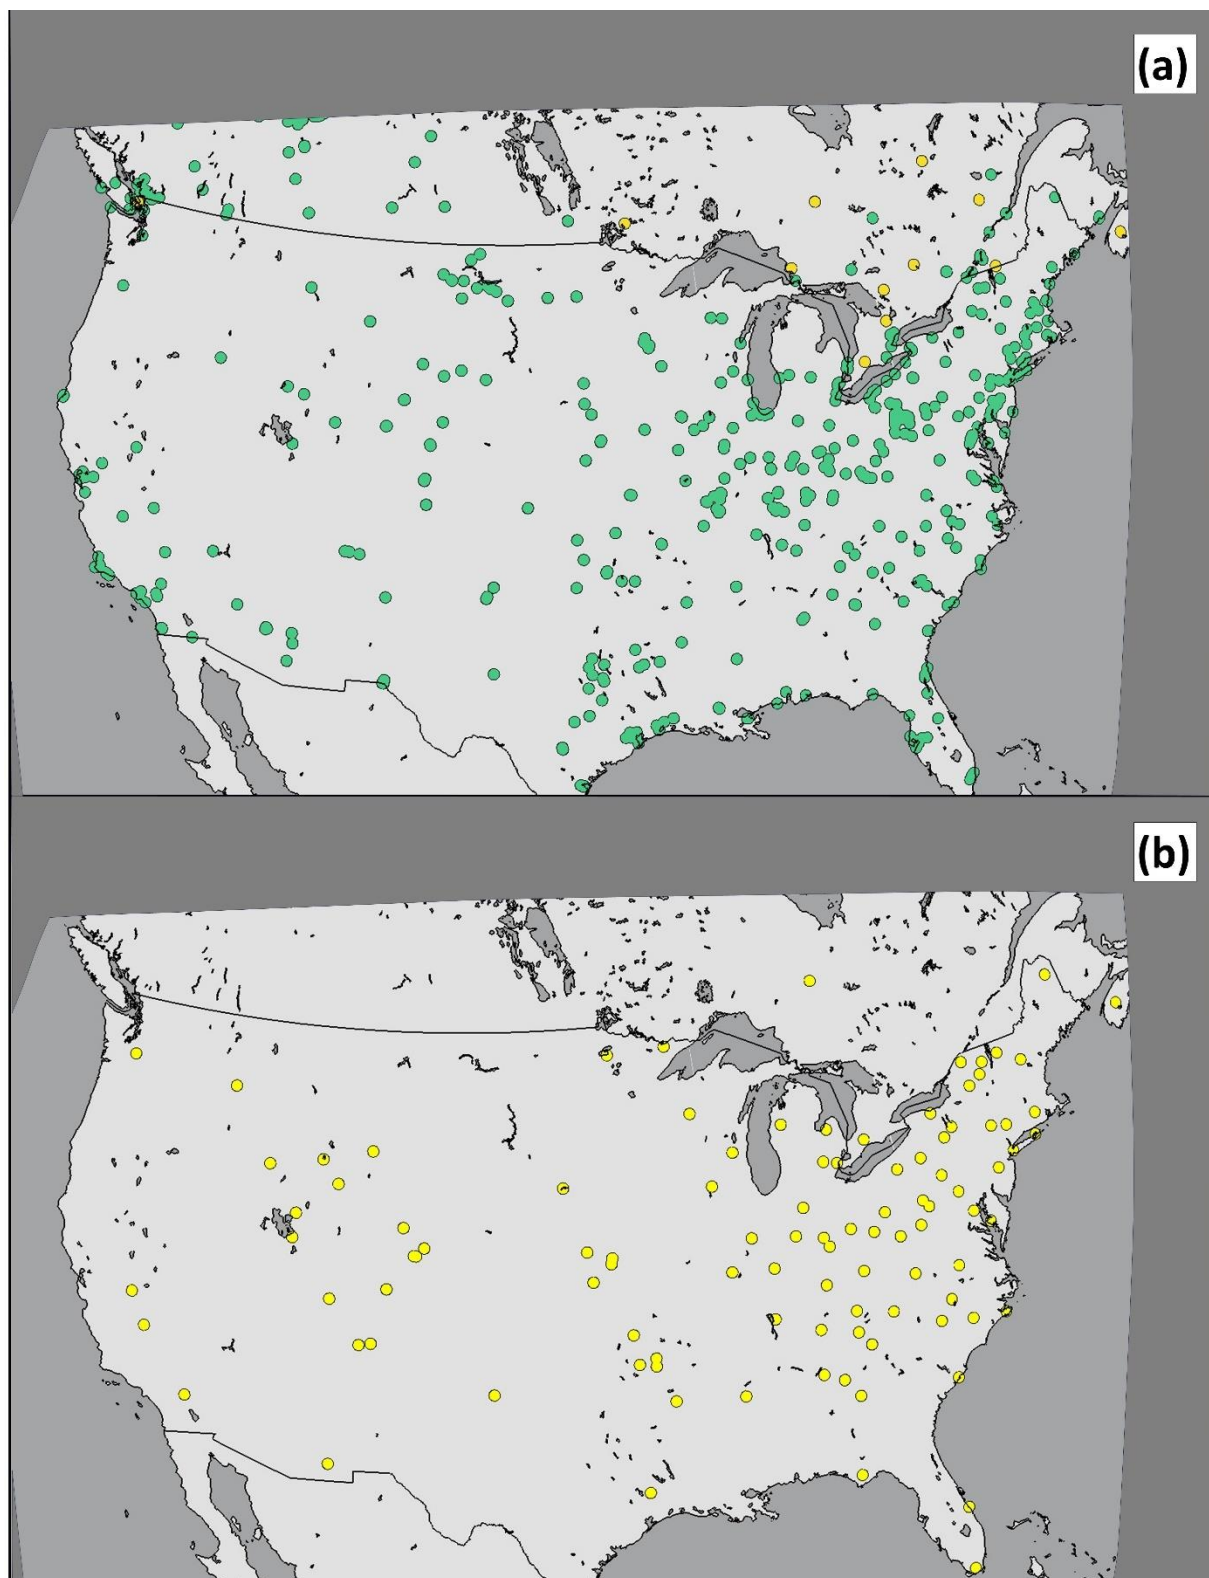

131

132



133 Figure S9. (a) SO<sub>2</sub> surface observation station locations (yellow: EMEP Hourly; green: AIRBASE  
134 hourly), and (b) EMEP wet deposition observation stations, EU AQMEII4 common domain, 2010.

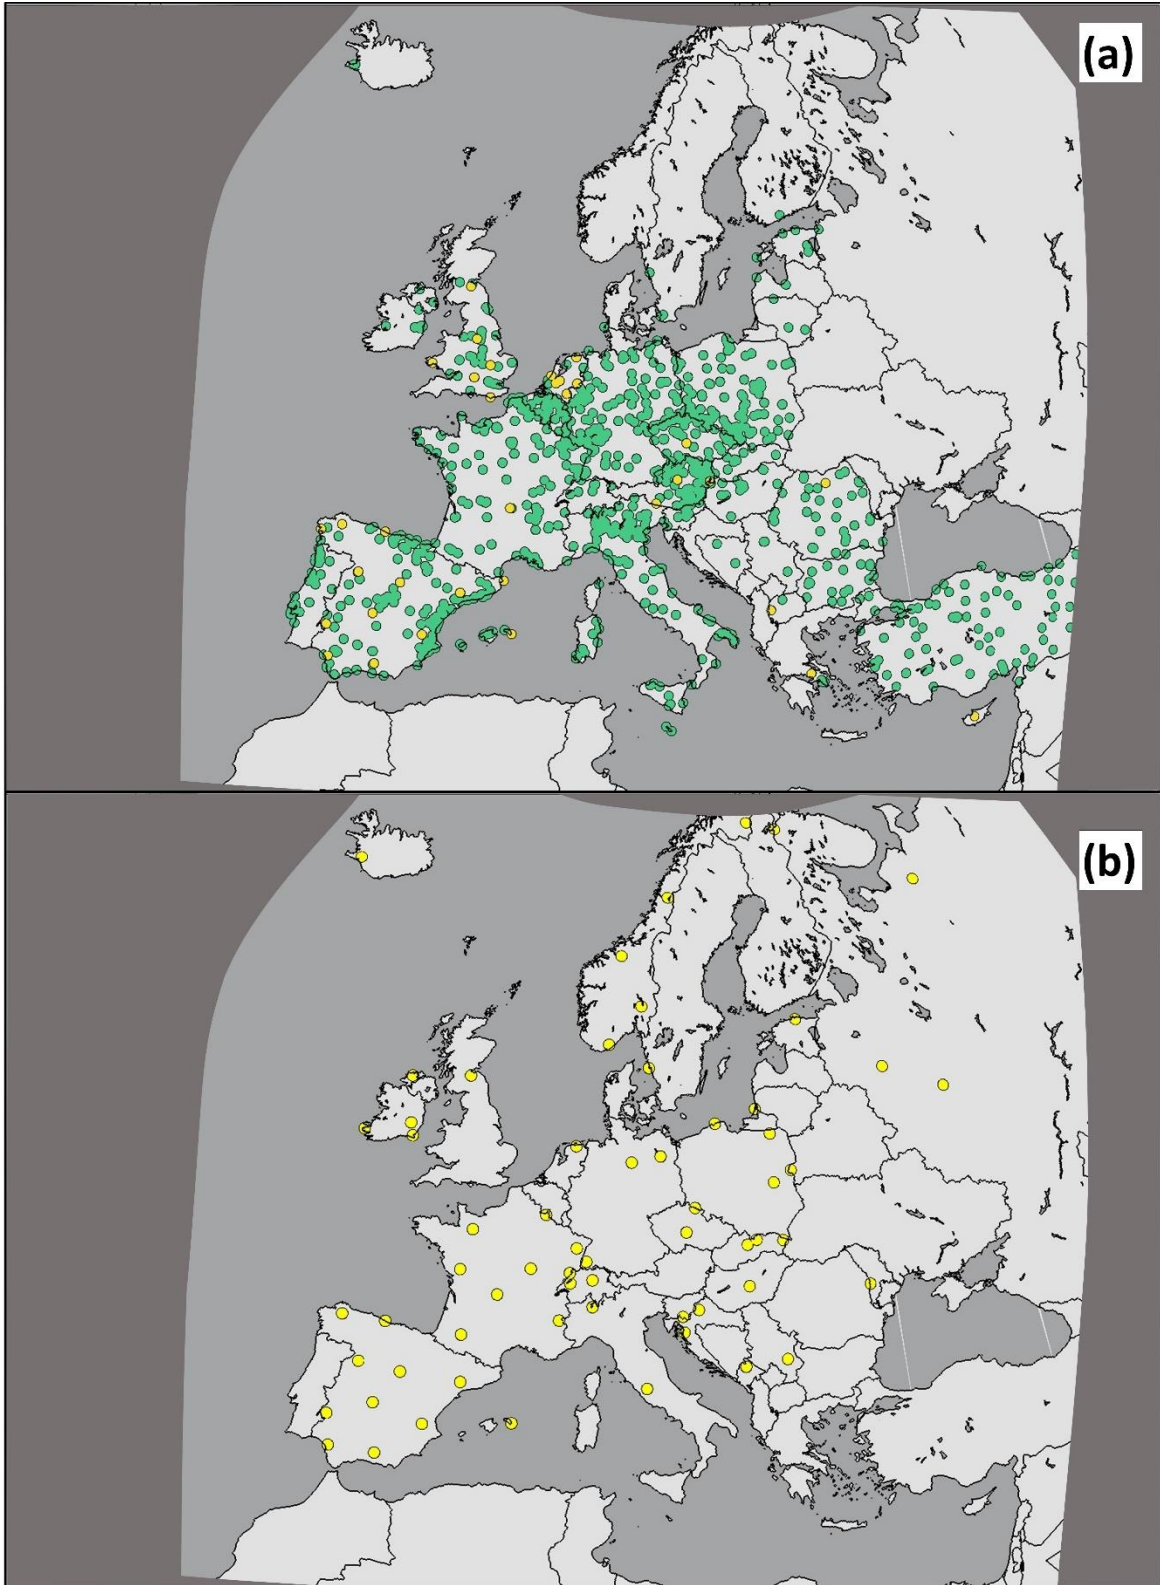

135



136 *4.0 Cross-track Infrared Sounding (CrIS) Sensor Retrieval Details*

137

138 The satellite surface volume mixing ratio ammonia observations are from the Cross-track Infrared  
139 Sounding (CrIS) sensor using the CrIS Fast Physical Retrieval (CFPR) algorithm (Shephard and Cady-  
140 Pereira, 2015; Shephard et al., 2020) with updates that include account for non-detects (White et al.,  
141 2023). The CrIS instrument pixel footprint is a 14 km circle at nadir with a 2200 km swath that provides  
142 complete daily global coverage. The CFPR minimum detection limit can vary depending on the  
143 atmospheric state but is as low as ~0.3-0.5 ppbv in favourable retrieval conditions (e.g. Kharol et al.,  
144 2018). In this study the CFPR 2016 pixel-level daytime observations, from NOAA/NASA Suomi  
145 National Polar-orbiting Partnership (SNPP) satellite over North America with a daytime local solar  
146 overpass time of 13:30, were gridded and averaged into annual values with a grid spacing of ~12.5 km to  
147 match up with model simulations.

148 References for CrIS section:

149 Kharol, S. K., Shephard, M. W., McLinden, C. A., Zhang, L., Sioris, C. E., O'Brien, J. M., Vet, R., Cady-  
150 Pereira, K. E., Hare, E., Siemons, J., and Krotkov, N. A.: Dry deposition of reactive nitrogen from  
151 satellite observations of ammonia and nitrogen dioxide over North America, *Geophys. Res. Lett.*,  
152 45, 1157–1166, <https://doi.org/10.1002/2017GL075832>, 2018.

153 Shephard, M. W.; and Cady-Pereira, K. E.: Cross-track Infrared Sounder (CrIS) satellite observations of  
154 tropospheric ammonia, *Atmos. Meas. Tech.*, 2015, 8, 1323–1336, [https://doi.org/10.5194/amt-8-1323-](https://doi.org/10.5194/amt-8-1323-2015)  
155 2015.

156 Shephard, M. W.; Dammers, E.; Cady-Pereira, K. E.; Kharol, S. K.; Thompson, J.; Gainariu-Matz, Y.;  
157 Zhang, J.; McLinden, C. A.; Kovachik, A.; Moran, M.; Bittman, S.; Sioris, C.; Griffin, D.;  
158 Alvarado, M. J.; Lonsdale, C.; Savic-Jovicic, V.; and Zheng, Q.; Ammonia measurements from  
159 space with the Cross-track Infrared Sounder (CrIS): characteristics and applications, *Atmos.*  
160 *Chem. Phys.*, 2020, 20, 2277–2302, <https://doi.org/10.5194/acp-20-2277-2020>.

161 White, E., M. W. Shephard, K. E. Cady-Pereira, S. Kharol, S. Ford, E. Dammers, E. Chow, N. Thiessen,  
162 D. Tobin, G. Quinn, J. O'Brien, J. Bash, Accounting for Non-detects in Satellite Retrievals:  
163 Application Using CrIS Ammonia Observations, *Remote Sensing*, 15, 2610,  
164 <https://doi.org/10.3390/rs15102610>, 2023.

165

166

167 *5.0 Precipitation Evaluation*

168 Figure S10. Precipitation totals expressed as monthly averages, for (a) Daily NADP sites and (b) Weekly  
169 CAPMoN sites.

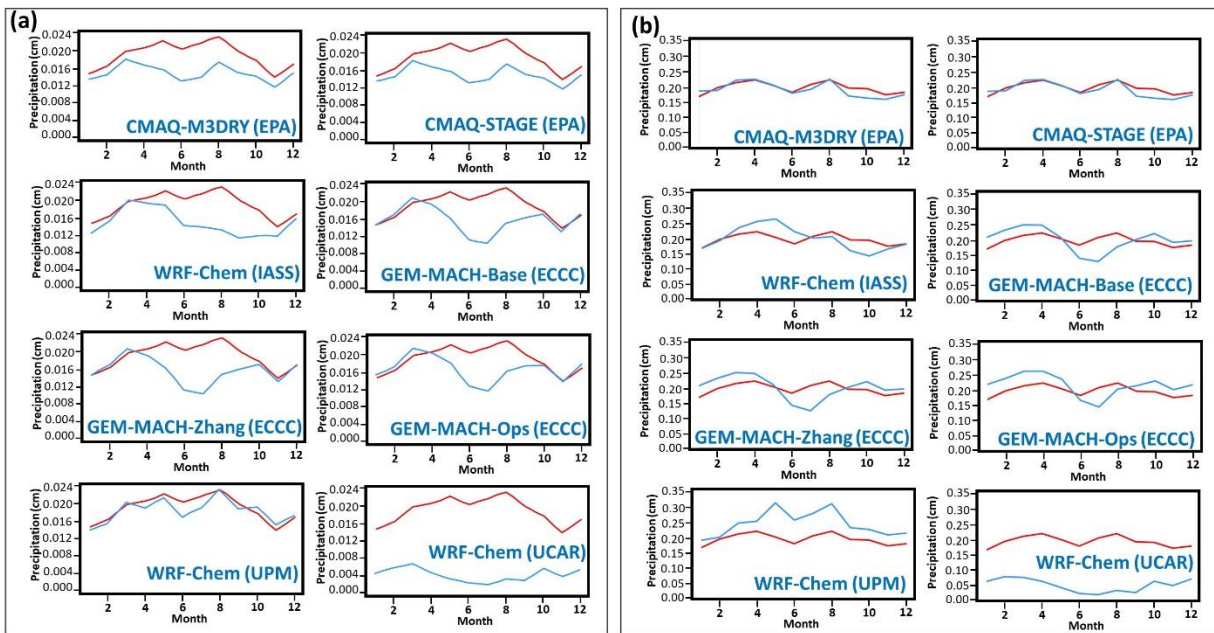

170

171

172 *6.0 Additional annual effective mass flux figures*

173 Figure S11. Spatial distribution of annual effective mass flux of HNO<sub>3</sub> via cuticle resistance pathway,  
174 AQMEII4 NA models, 2016 (eq ha<sup>-1</sup> yr<sup>-1</sup>).

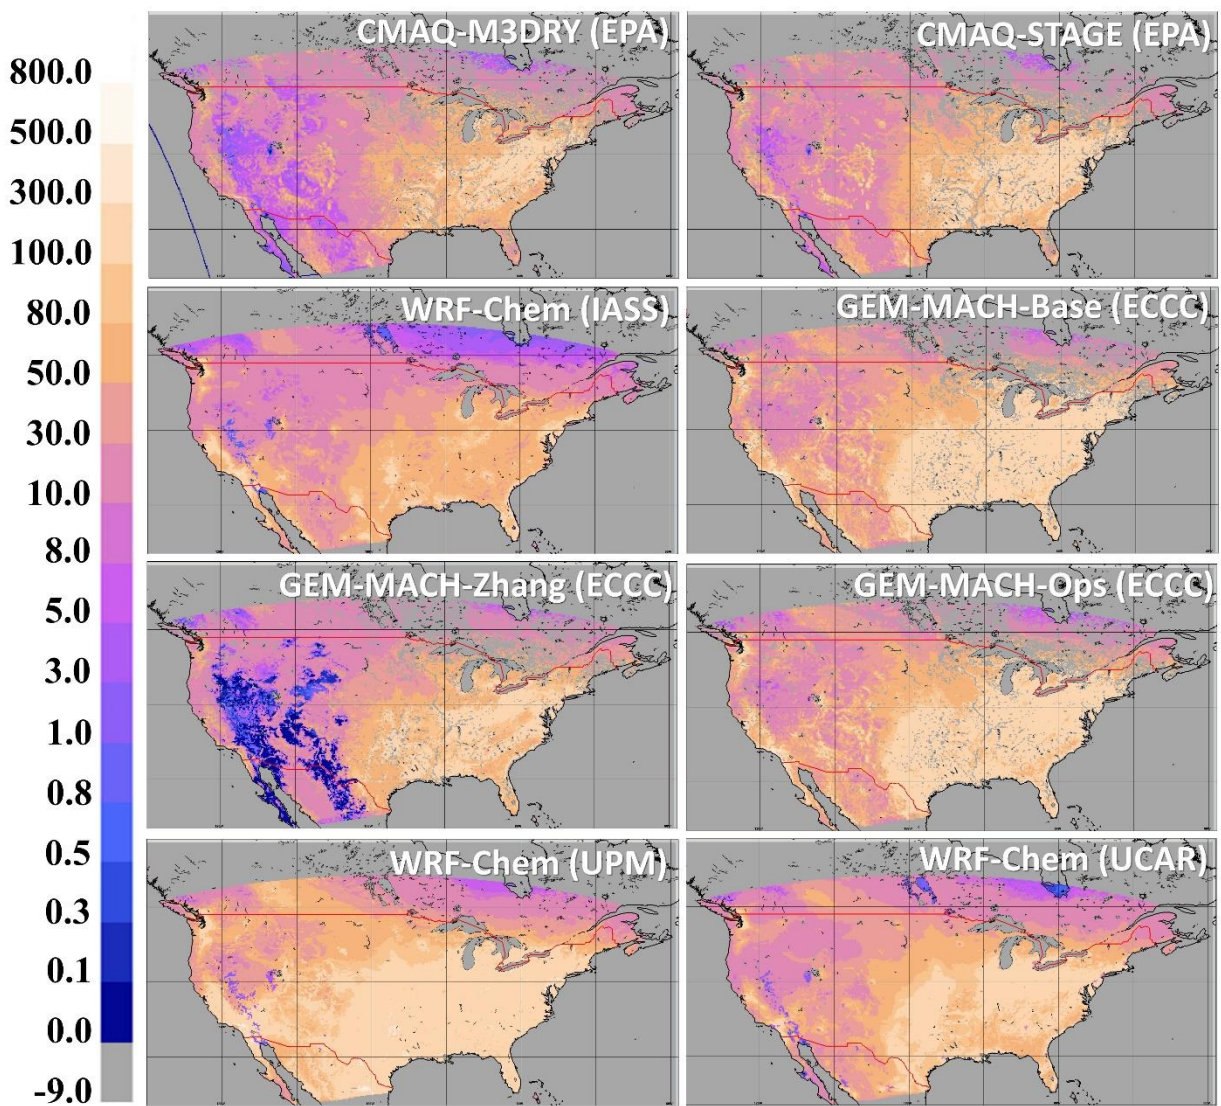

175

176



177 Figure S12. Spatial distribution of annual effective mass flux of HNO<sub>3</sub> via soil resistance pathway,  
 178 AQMEII4 NA models, 2016 (eq ha<sup>-1</sup> yr<sup>-1</sup>). Note that the CMAQ models incorporate lower canopy  
 179 effective flux as part of the soil effective flux (see Figure SI14).

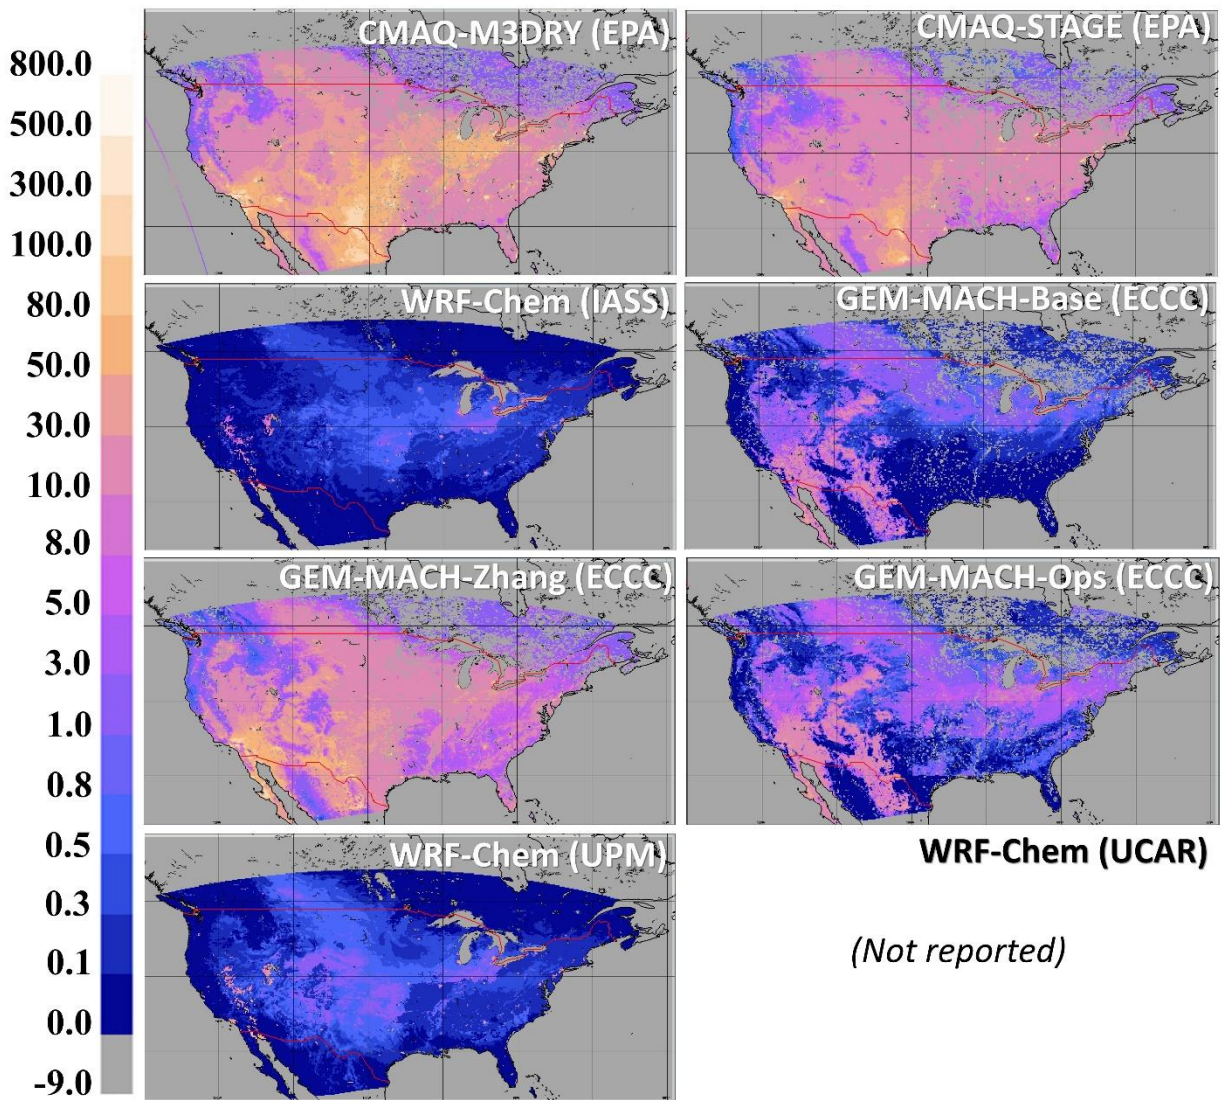

180

181



182 Figure S13. Spatial distribution of annual effective mass flux of HNO<sub>3</sub> via stomatal resistance pathway,  
183 AQMEII4 NA models, 2016 (eq ha<sup>-1</sup> yr<sup>-1</sup>).

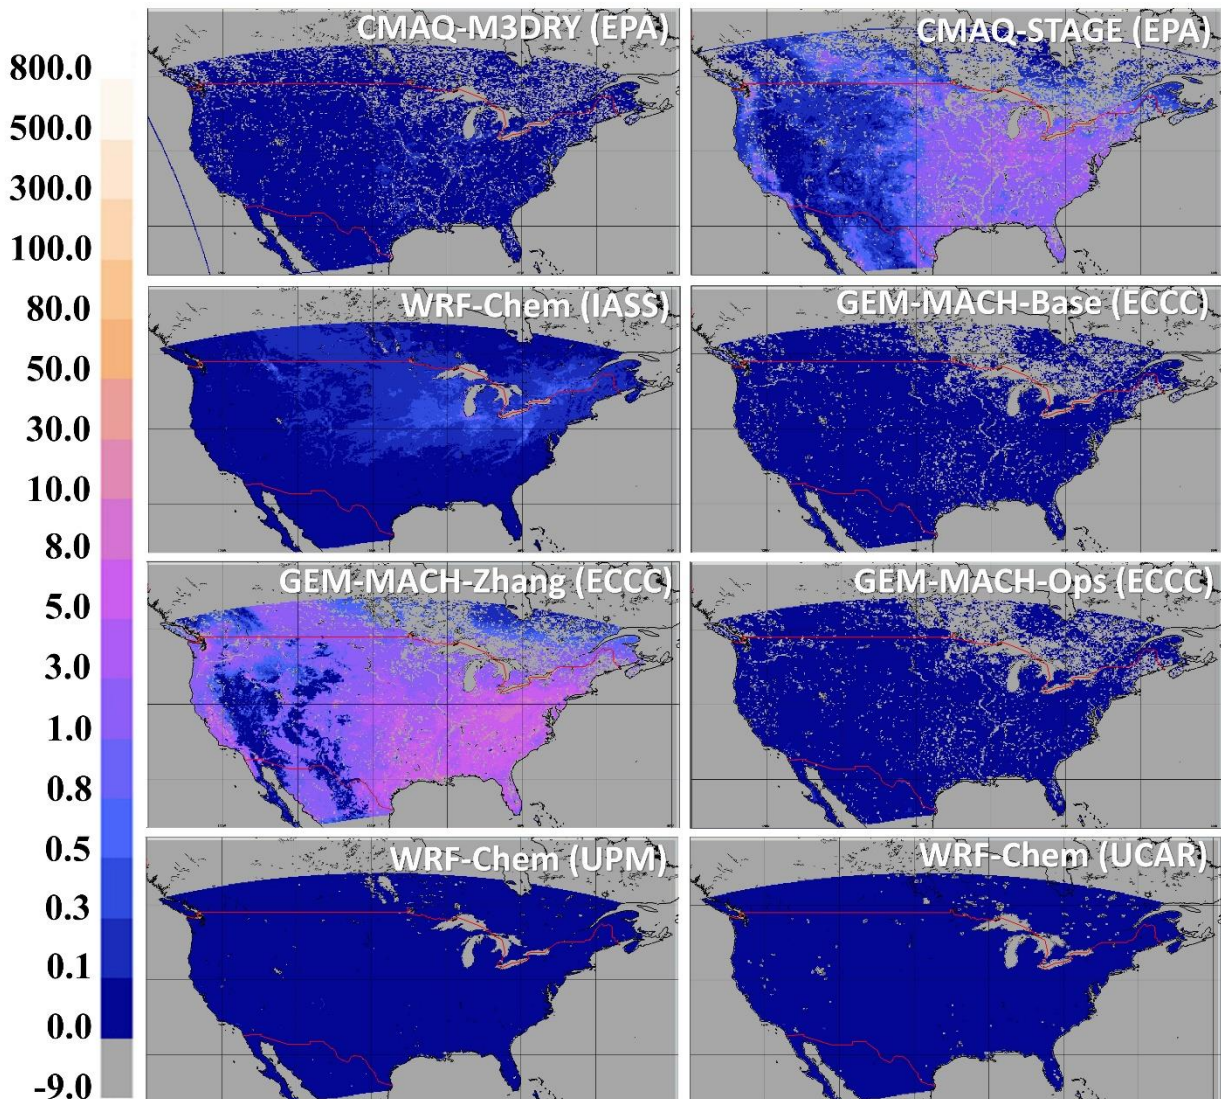

184

185

186 Figure S14. Spatial distribution of annual effective mass flux of HNO<sub>3</sub> via lower canopy resistance  
187 pathway, AQMEII4 NA models, 2016 (eq ha<sup>-1</sup> yr<sup>-1</sup>).

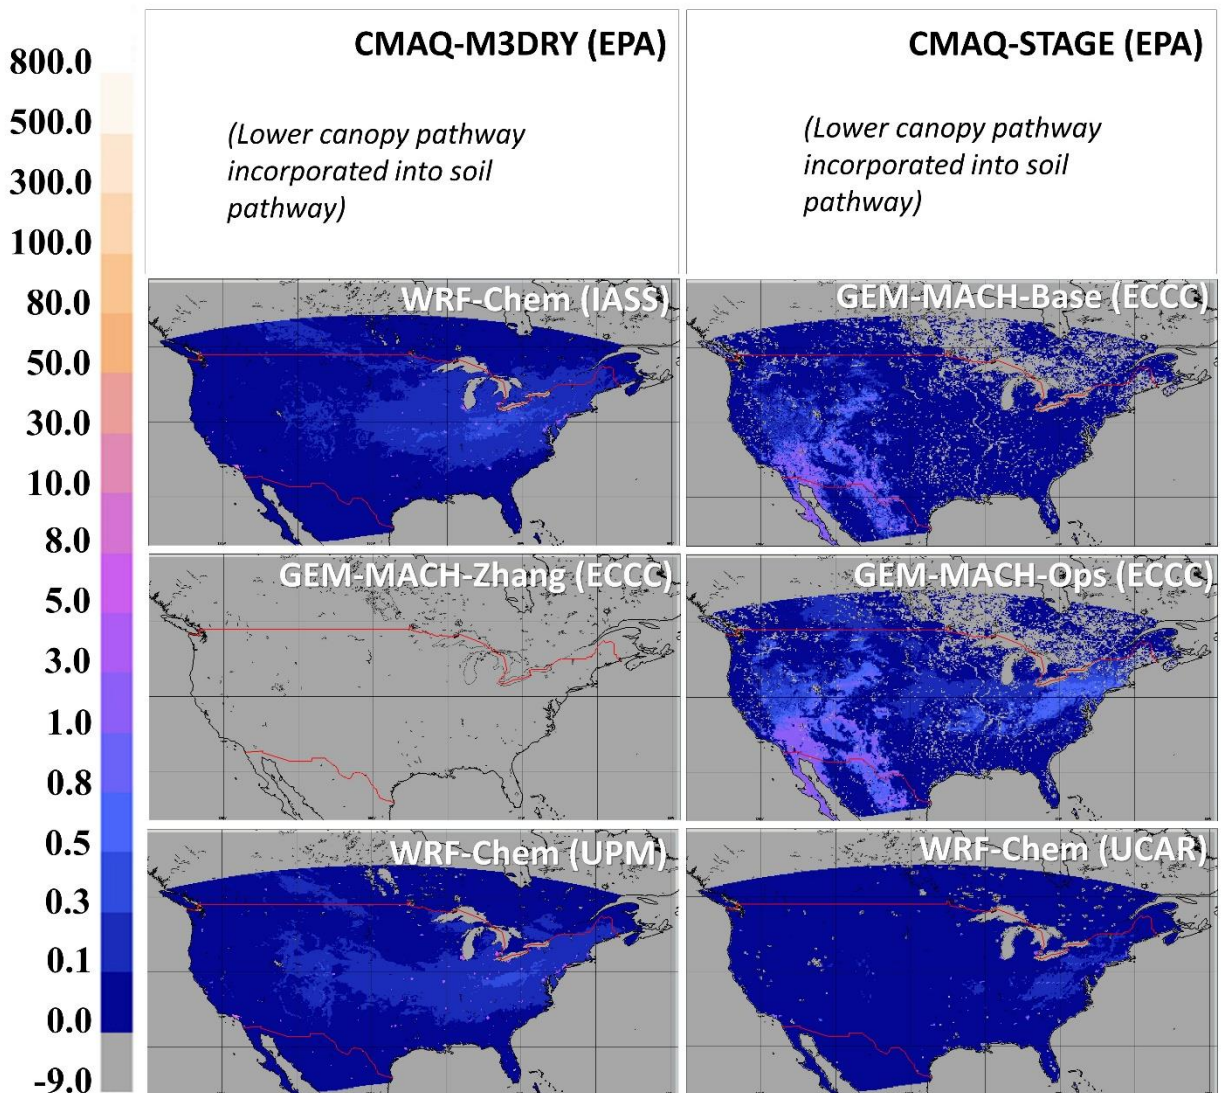

188

189

190



191 Figure S15. Spatial distribution of annual effective mass flux of SO<sub>2</sub> via cuticle (a) and (b) soil pathways,  
192 AQMEII4 EU models, 2010 (eq ha<sup>-1</sup> yr<sup>-1</sup>).

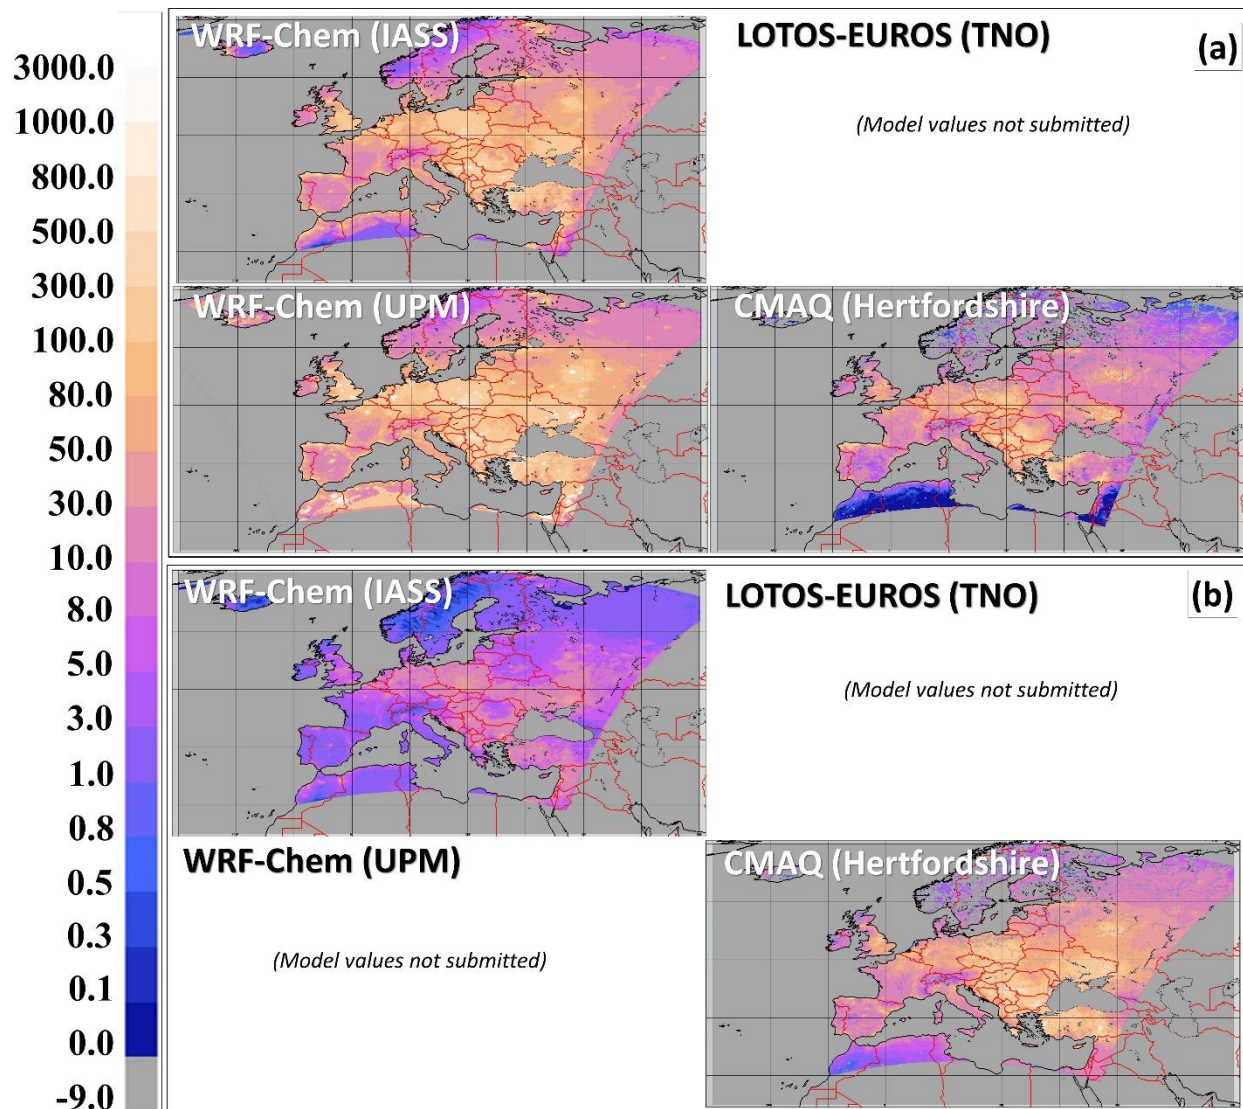

193

194

195 Figure S16. Spatial distribution of annual effective mass flux of SO<sub>2</sub> via stomatal (a) and (b) lower  
196 canopy pathways, AQMEII4 EU models, 2010 (eq ha<sup>-1</sup> yr<sup>-1</sup>).

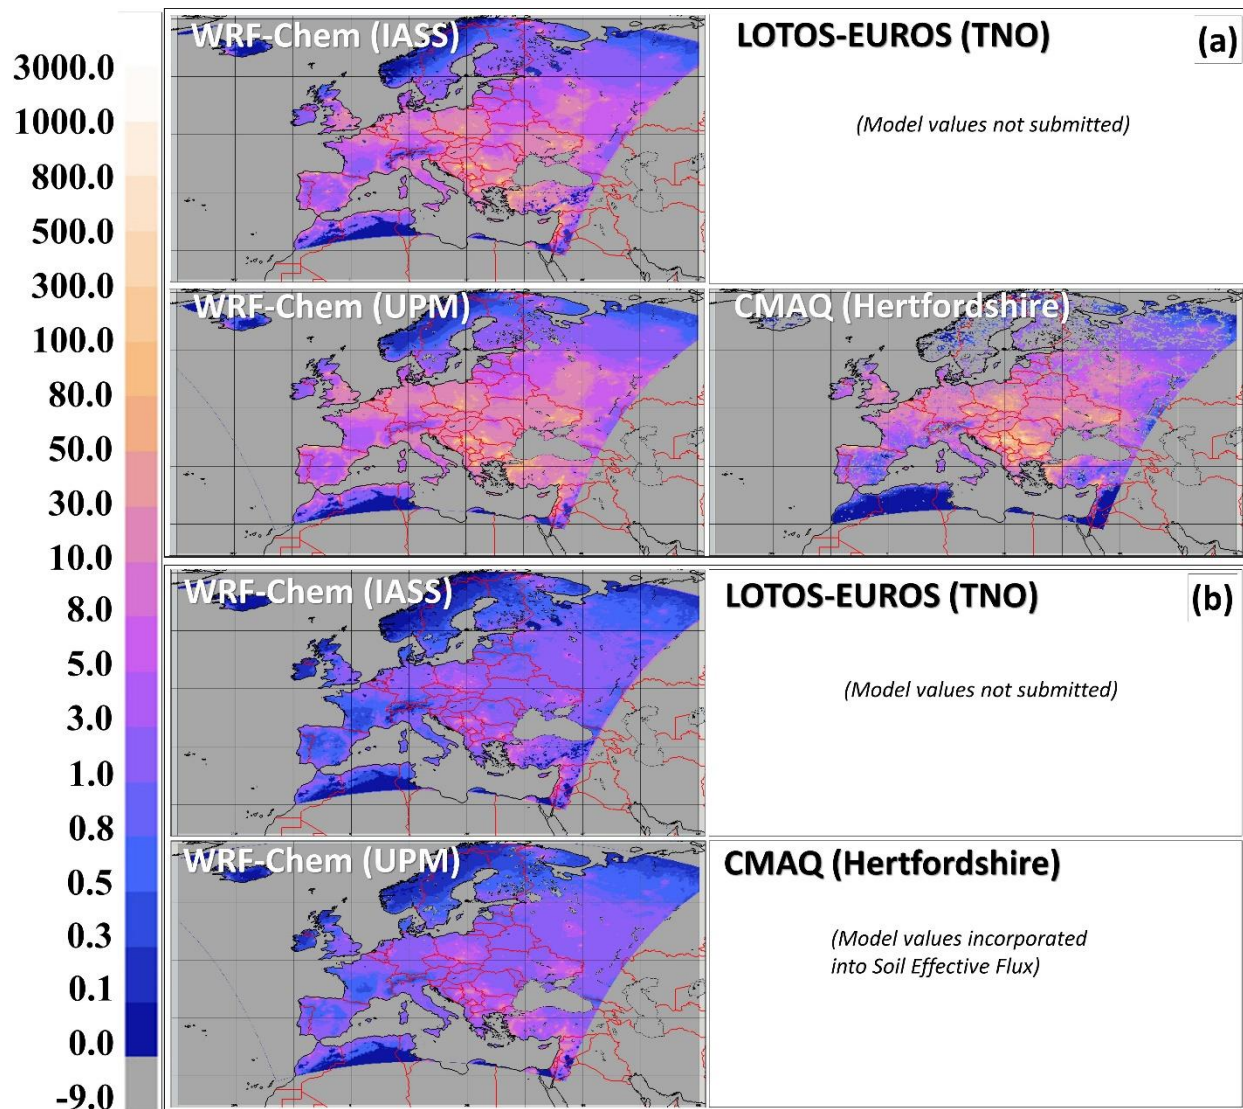

197

198



199

200 Figure S17. Spatial distribution of annual effective mass flux of HNO<sub>3</sub> via (a) cuticle, (b) soil pathways,  
201 AQMEII4 EU models, 2010 (eq ha<sup>-1</sup> yr<sup>-1</sup>).

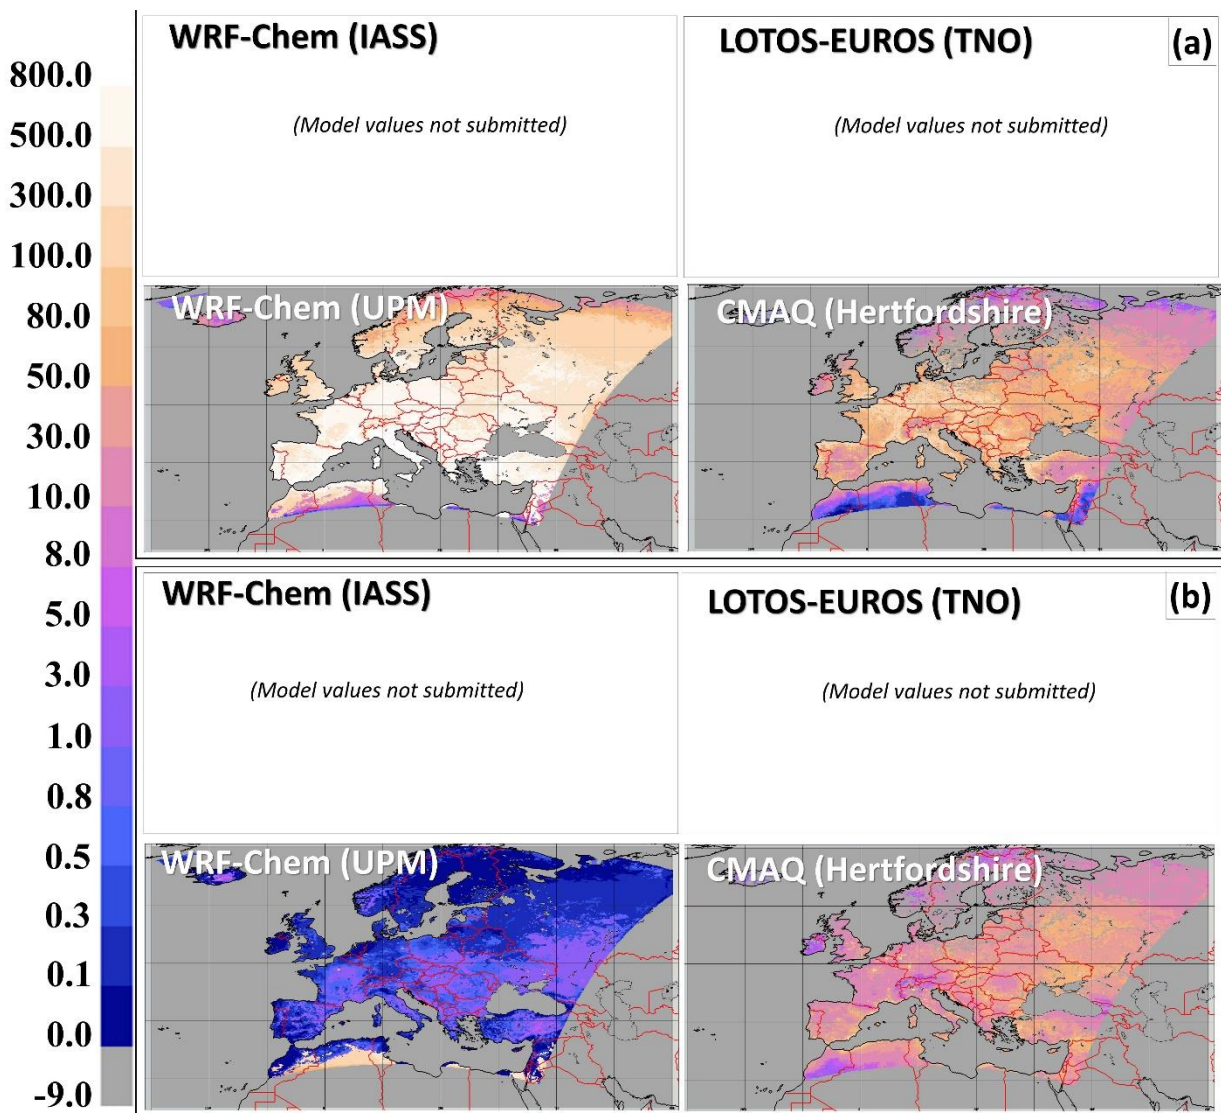

202

203

204 Figure S18. Spatial distribution of annual effective mass flux of HNO<sub>3</sub> via (a) stomatal resistance  
 205 pathway, (b) lower canopy resistance pathway, AQMEII4 EU models, 2010 (eq ha<sup>-1</sup> yr<sup>-1</sup>).

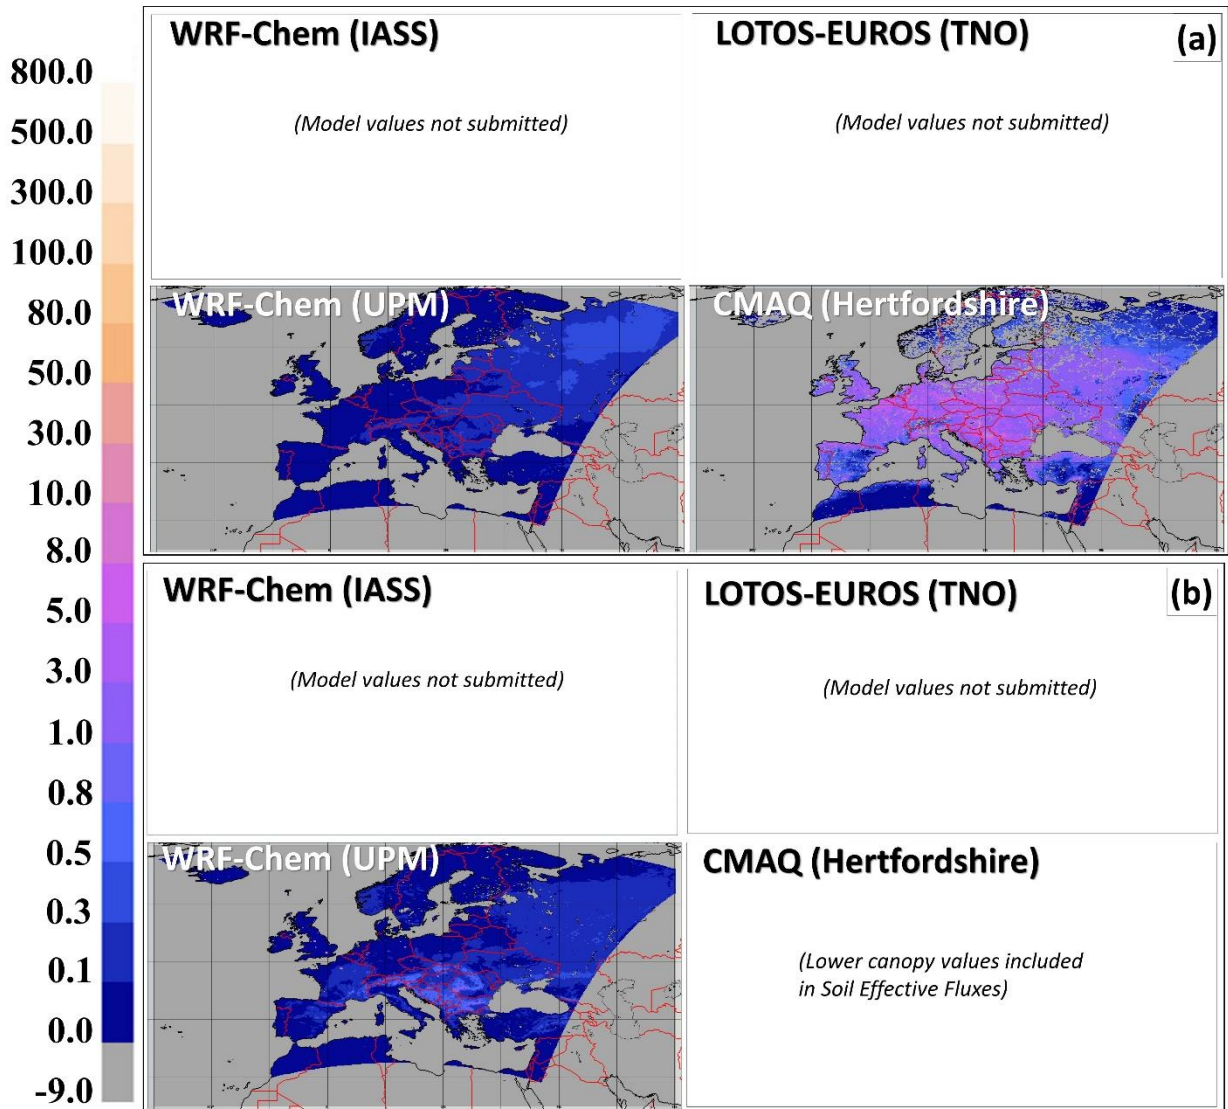

206

207

208

209
